# Supplementary material for: Identification of two HLA-A*0201 immunogenic epitopes of lactate dehydrogenase C (LDHC): potential novel targets for cancer immunotherapy
Source: Cancer Immunol Immunother. 2020 Jan 13;69(3):449–63. doi: 10.1007/s00262-020-02480-4 (PMC7044258; doi:10.1007/s00262-020-02480-4)
Supplement: Supplementary file 1 — Supplementary file1 (PDF 565 kb) [file 262_2020_2480_MOESM1_ESM.pdf]

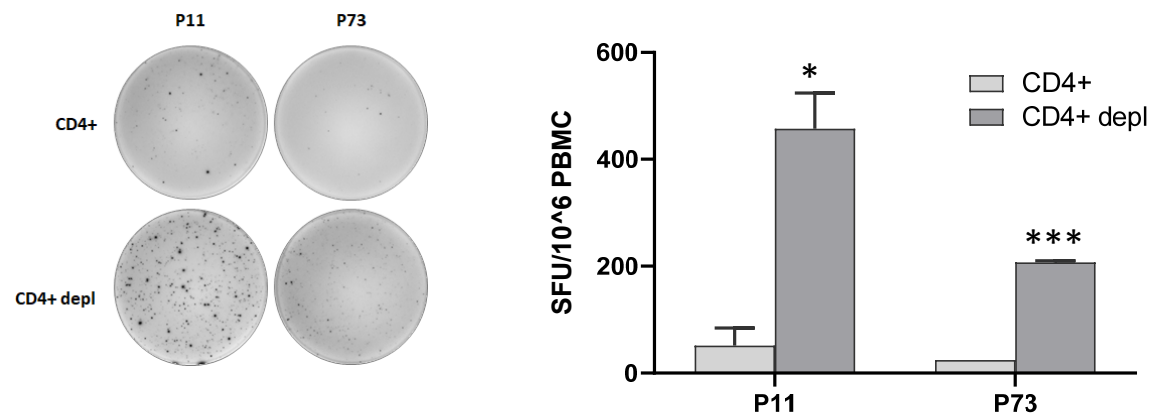

**Supplementary Figure 1. CD4+ and CD4+ depleted peptide-specific T cell immune responses.** Following co-culture with A2+/high HCC1500 breast cancer cells, P11- and P73-primed T cells were fractionated into 2 subpopulations, a CD4+ and CD4+depleted T cell subset, for IFN- $\gamma$  ELISpot analysis. Representative IFN- $\gamma$  ELISpot images are given for one donor, while Tukey box plots represent data of two donors. \*  $p < 0.05$ , \*\*\*  $p < 0.001$ .

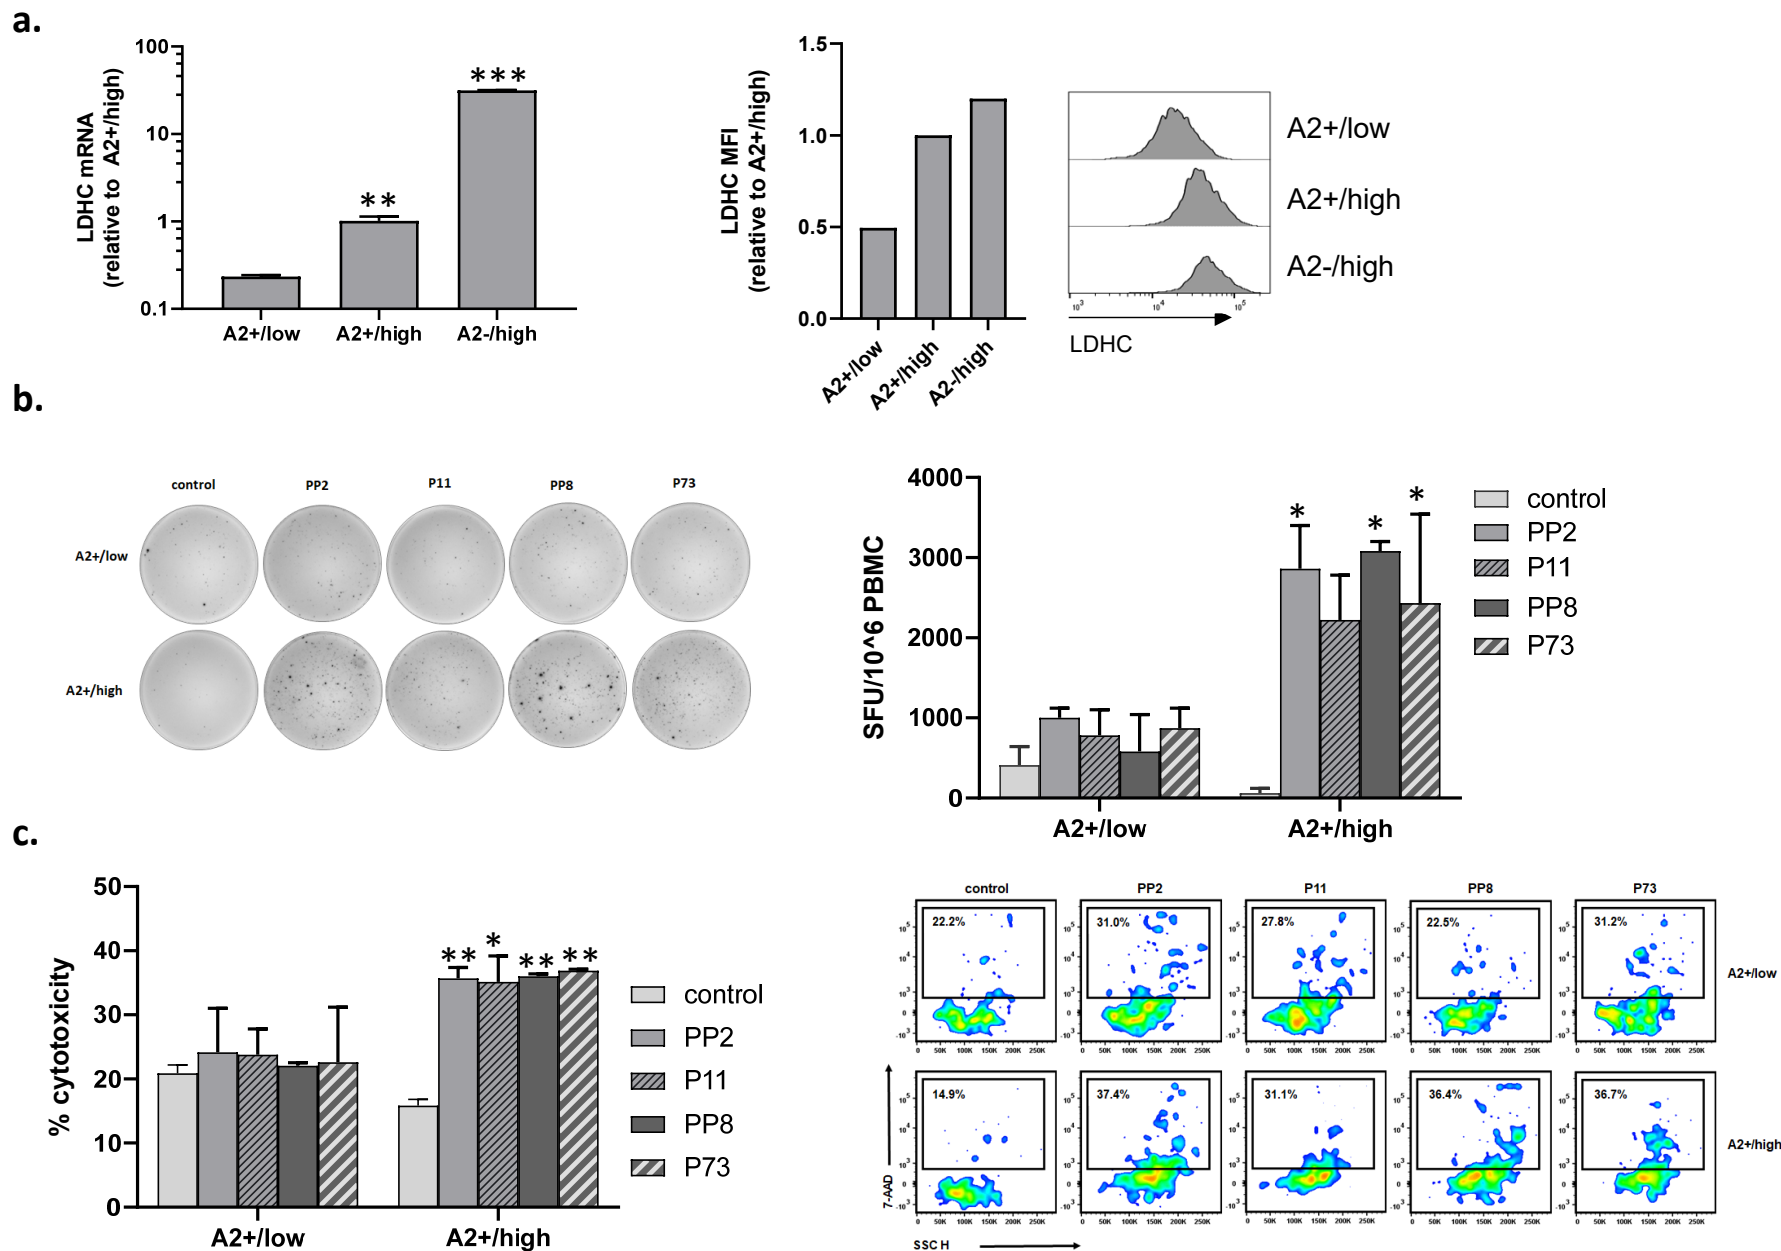

**Supplementary Figure 2. Immunogenicity of P11- and P73- specific T cells against loss-of-function LDHC BT549 breast cell line model.** **a**, LDHC expression of shCTR (A2+/high) and shLDHC (A2+/low) BT549 cells, determined by qRT-PCR, western blot and flow cytometry. **b**, IFN- $\gamma$  release and **c**, cytolytic activity of PP2-, PP8- and P11- and P73-specific T cells in co-culture with A2+/high and A2+/low BT549 cells. Representative IFN- $\gamma$  ELISpot images are given for one donor, while Tukey box plots represent data of two donors. MFI, mean fluorescence intensity. \*  $p < 0.05$ , \*\*  $p < 0.01$ , \*\*\*  $p < 0.001$ .

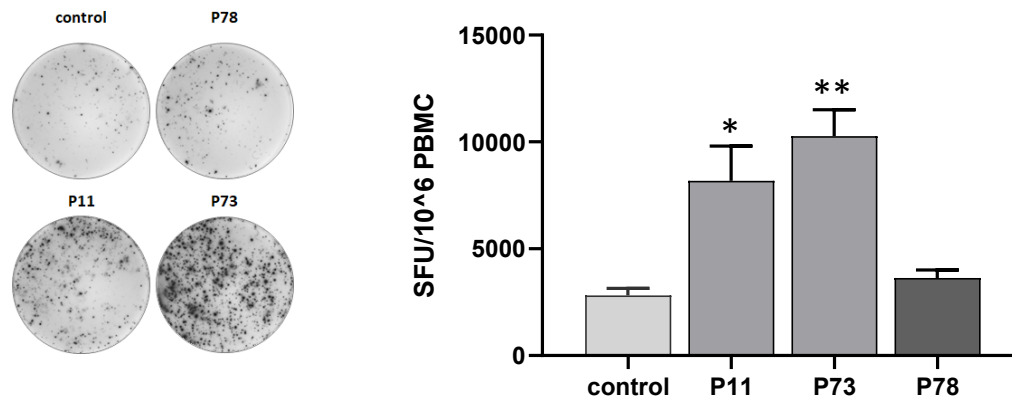

**Supplementary Figure 3. HLA-A\*02 specificity of P11- and P73-induced T cell responses.** LDHC peptide loaded-T2 cells were incubated with their respective primed T cells followed by measurement of IFN- $\gamma$  release. T2 cells were loaded with either P11, P73 or no peptide (control) in addition to a non-reactive peptide (P78). Representative IFN- $\gamma$  ELISpot images are given for one donor, while Tukey box plots represent data of two donors. . \*  $p < 0.05$ , \*\*  $p < 0.01$ .
